# Supplementary figures and images for: Light-induced C–H activation on single-atom doped plasmonic silver nanoparticles
Source: Royal Society of Chemistry journal article supplement (doi:10.1039/d5cp04258e), 2026-01-01

0.0 V/Å

Dist\_BLV

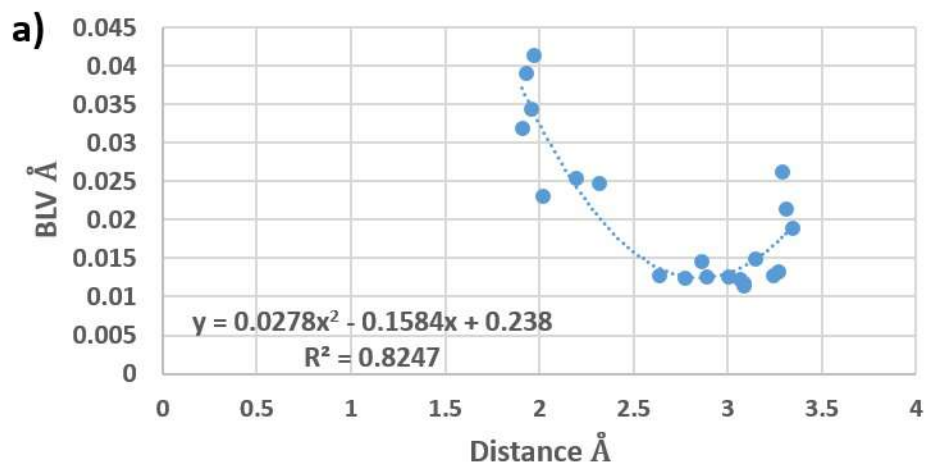

0.8 V/Å

Dist\_BLV

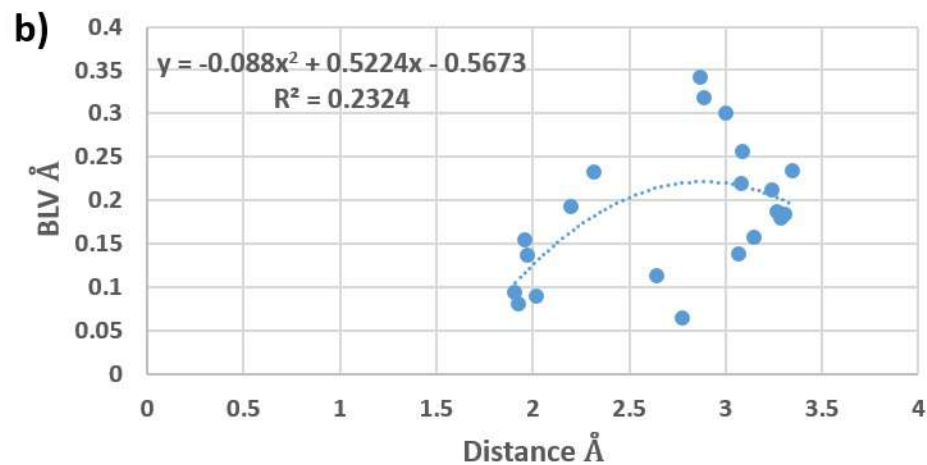

ICOHP\_BLV

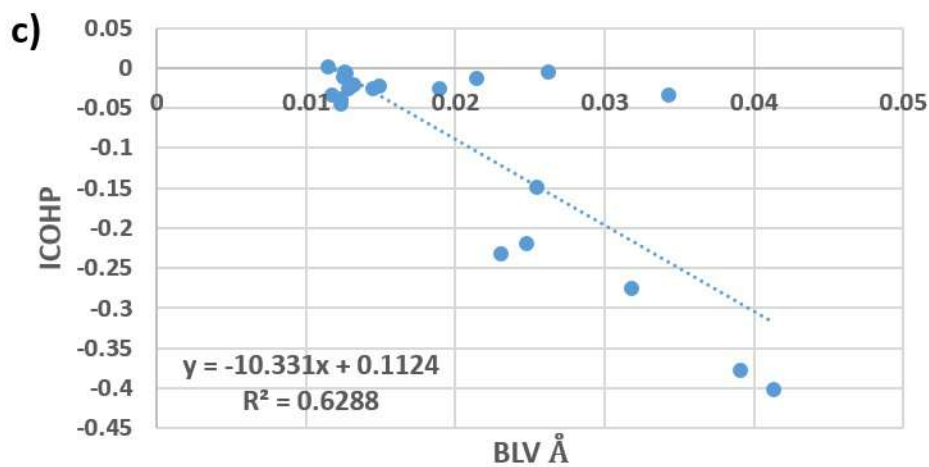

ICOHP\_BLV

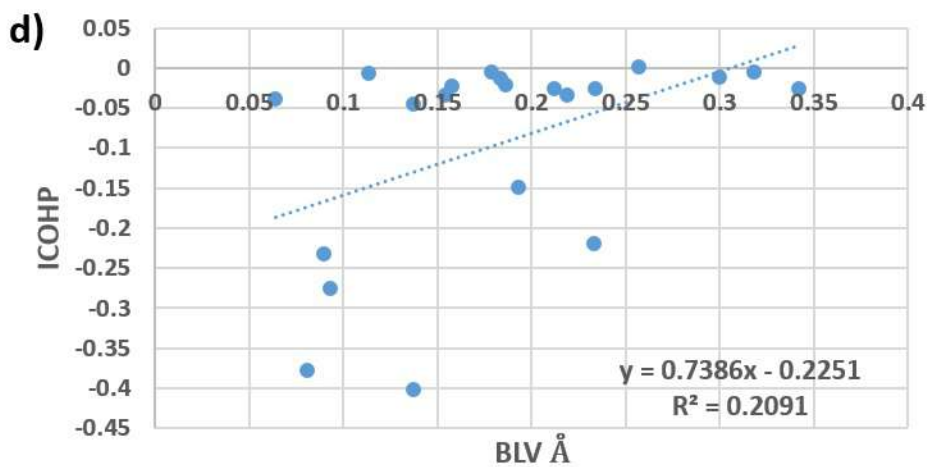

Bader\_BLV

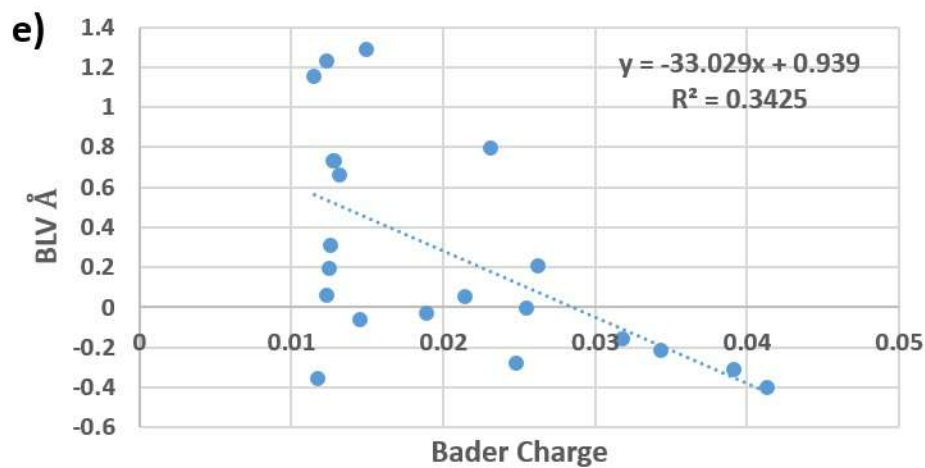

Bader\_BLV

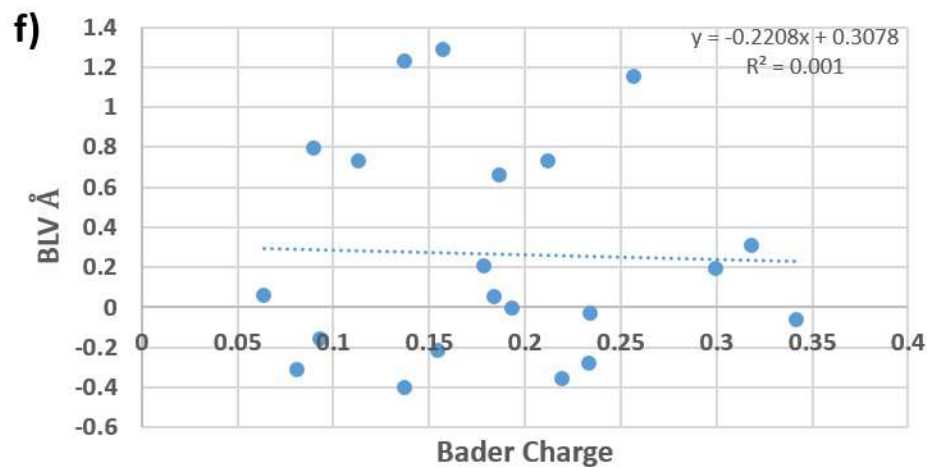

Supplement: d5cp04258e2.zip [file fig_s1.pdf › SI figures/fig_s1.pdf]

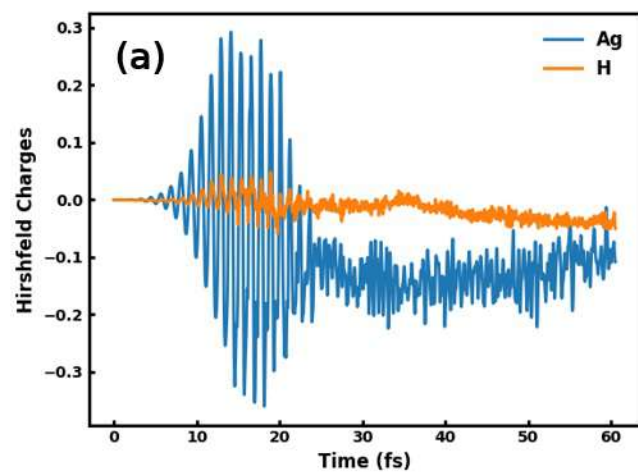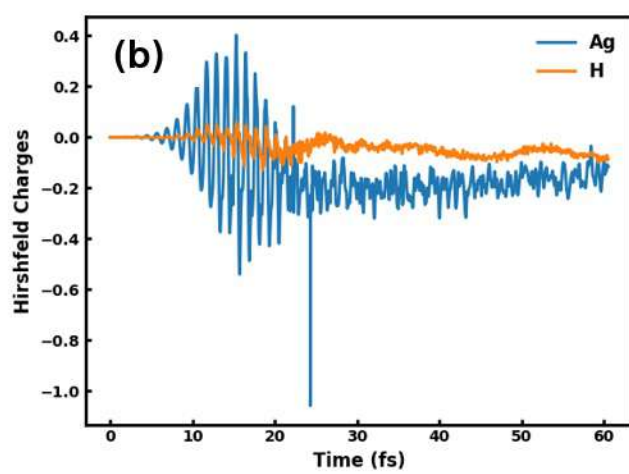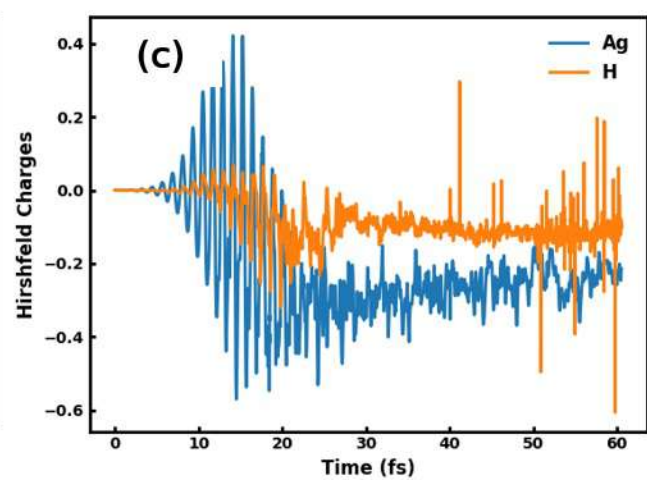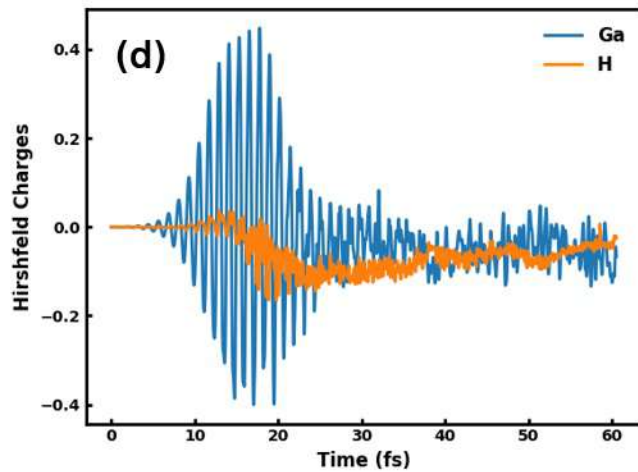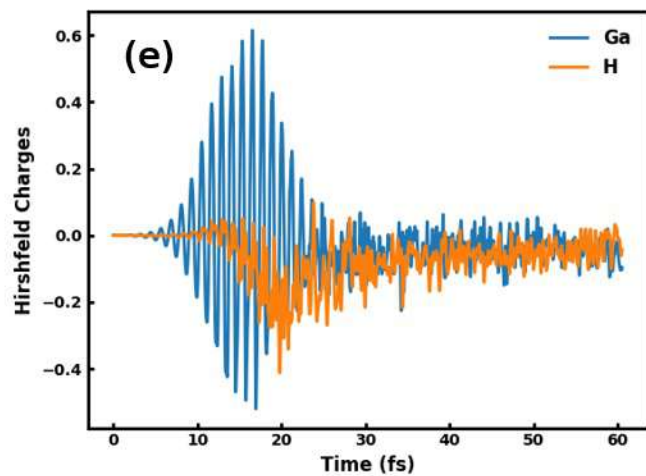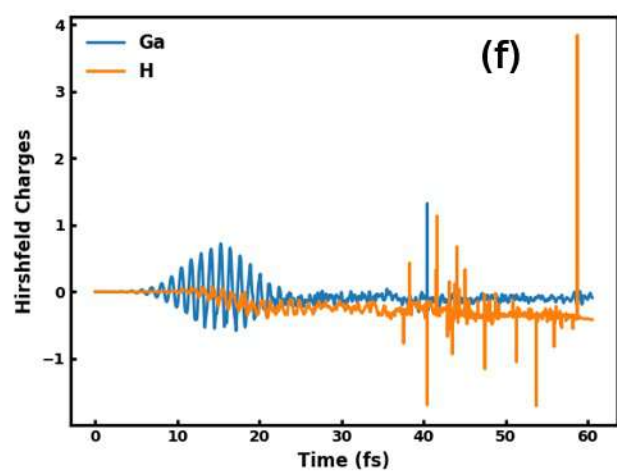

Supplement: d5cp04258e2.zip [file fig_s2.pdf › SI figures/fig_s2.pdf]

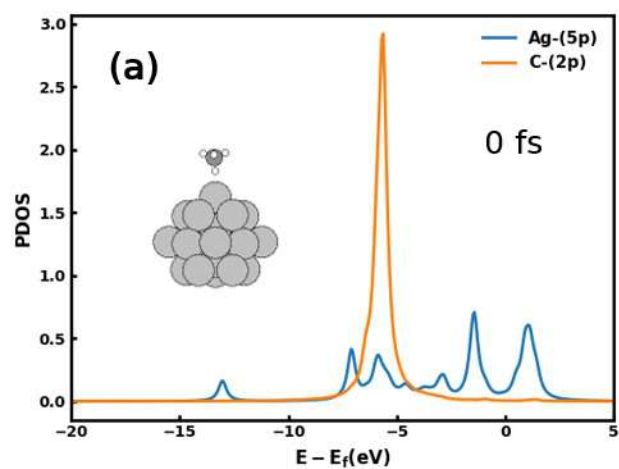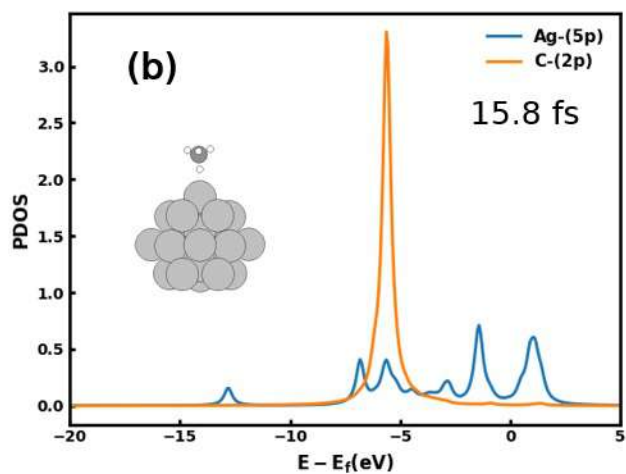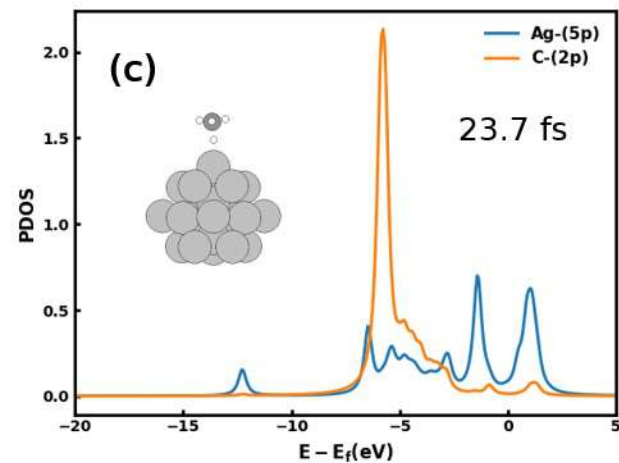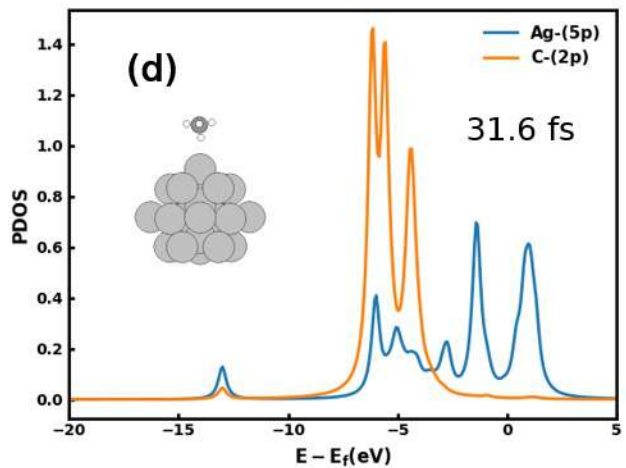

Supplement: d5cp04258e2.zip [file fig_s3.pdf › SI figures/fig_s3.pdf]
